# Supplementary material
Source: PubMed Central journal article supplement (PMC3459334)
Supplement: NIHMS404423-supplement-1_si_001.pdf [file NIHMS404423-supplement-1_si_001.pdf]

## Supporting Information

# Non-eluting Enzymatic Antibiofilm Coatings

*Svetlana V. Pavlukhina,<sup>†</sup> Jeffrey B. Kaplan,<sup>\*,‡</sup> Li Xu,<sup>†</sup> Wei Chang,<sup>†</sup> Xiaojun Yu,<sup>†</sup> Srinivasa Madhyastha,<sup>#</sup> Nandadeva Yakandawala,<sup>#</sup> Almagul Mentbayeva,<sup>□</sup> Babar Khan,<sup>‡</sup> Svetlana A. Sukhishvili<sup>\*,†</sup>*

<sup>†</sup> Department of Chemistry, Chemical Biology and Biomedical Engineering, Stevens Institute of Technology, Hoboken, NJ 07030, USA

<sup>‡</sup> Department of Oral Biology, New Jersey Dental School, University of Medicine and Dentistry of New Jersey, Newark, NJ 07103, USA

<sup>#</sup> Kane Biotech Inc., 162-196 Innovation Drive, Winnipeg, MB, Canada R3T 2N2, Canada

<sup>□</sup> Department of Chemistry, 71, Al-Farabi Ave, Kazakh National University, Almaty, 050038, Kazakhstan

### AUTHOR INFORMATION

#### Corresponding Author

\*Phone: +1 201 216 5544. Fax: +1 201 216 8240. E-mail: [ssukhish@stevens.edu](mailto:ssukhish@stevens.edu) (S.A.S);

Phone: +1 973 972 9508. +1 973 972 0045. E-mail: [kaplanjb@umdnj.edu](mailto:kaplanjb@umdnj.edu) (J.B.K.).

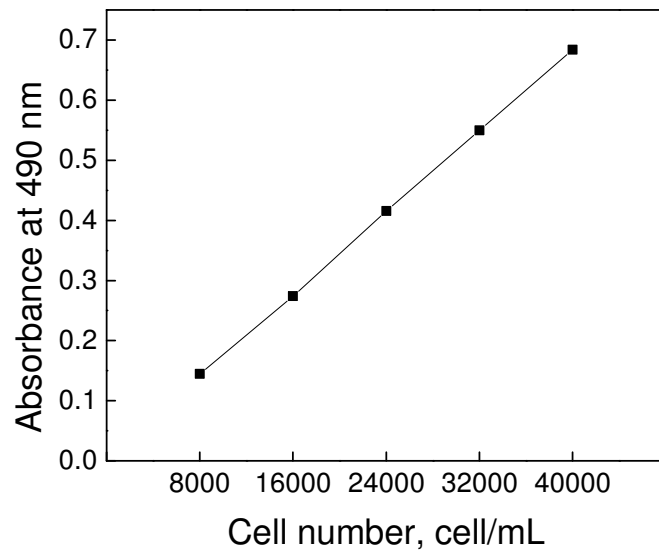

**Figure S1.** MTS calibration curve.

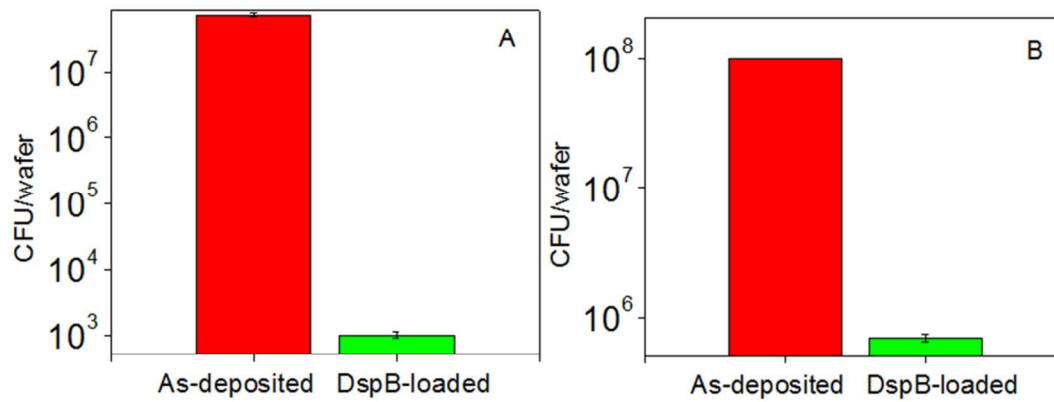

**Figure S2.** Quantification of *S. epidermidis* growth (strain 1467) on as-synthesized and DspB-loaded (PAH)<sub>8</sub> films using dilution plating after 9 and 16 hours (A and B, respectively).
